# Supplementary material for: Effects of Combined Exercise and Low Carbohydrate Ketogenic Diet Interventions on Waist Circumference and Triglycerides in Overweight and Obese Individuals: A Systematic Review and Meta-Analysis
Source: PubMed Central journal article supplement (PMC7835865; doi:10.3390/ijerph18020828), 2021-01-19
Supplement: ijerph-18-00828-s001.pdf [file ijerph-18-00828-s001.pdf]

**Supplementary Table S1. Assessments of the quality and risk of bias**

| First Author (year) | Random sequence generation | Allocation concealment | Blinding of participants and personnel | Blinding of outcome assessment | Complete outcome data | Selective reporting | Other bias |
|---------------------|----------------------------|------------------------|----------------------------------------|--------------------------------|-----------------------|---------------------|------------|
| Gregory (2017)      | +                          | +                      | ?                                      | ?                              | +                     | ?                   | +          |
| Gyorkos (2019)      | +                          | +                      | ?                                      | ?                              | +                     | +                   | +          |
| Sun (2019)          | +                          | +                      | ?                                      | ?                              | +                     | -                   | +          |
| Perissiou (2020)    | +                          | ?                      | ?                                      | ?                              | +                     | -                   | +          |
| Freedland (2019)    | +                          | +                      | ?                                      | ?                              | +                     | +                   | +          |
| LaFountain (2019)   | +                          | ?                      | ?                                      | ?                              | +                     | ?                   | +          |
| Jabekk (2010)       | +                          | +                      | ?                                      | ?                              | +                     | ?                   | +          |

+ = Low risk of bias, - = High risk of bias, ? = Unclear risk of bias, ITT = Intention-to-treat
